# Supplementary material for: Myosin IIa Promotes Antibody Responses by Regulating B Cell Activation, Acquisition of Antigen, and Proliferation
Source: PubMed Central journal article supplement (PMC5986709; doi:10.1016/j.celrep.2018.04.087), 2018-05-22
Supplement: mmc1.pdf [file mmc1.pdf]

**Cell Reports, Volume 23**

**Supplemental Information**

**Myosin IIa Promotes Antibody Responses  
by Regulating B Cell Activation, Acquisition  
of Antigen, and Proliferation**

**Robbert Hoogeboom, Elizabeth M. Natkanski, Carla R. Nowosad, Dessislava Malinova, Rajesh P. Menon, Antonio Casal, and Pavel Tolar**

## Supplemental Figures

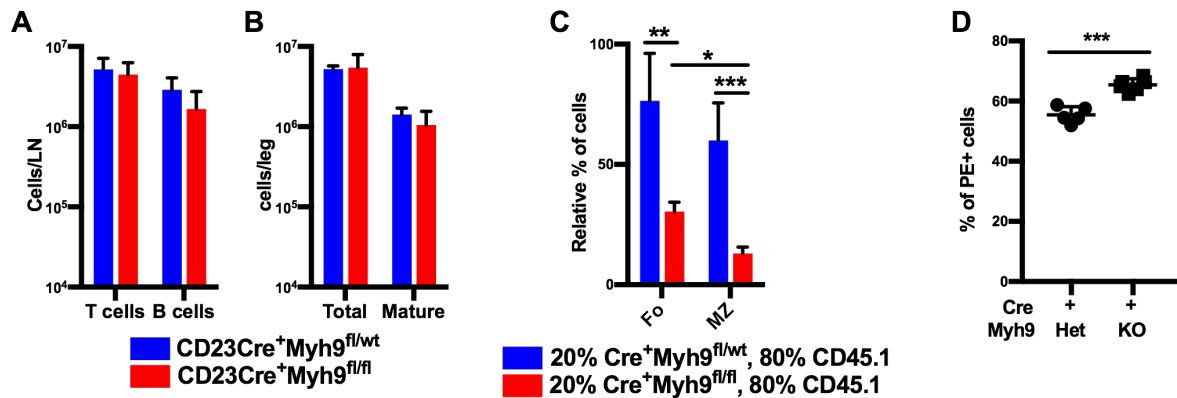

**Figure S1. B cell numbers in secondary lymphoid organs of CD23Cre<sup>+</sup>Myh9<sup>fl/fl</sup> mice, related to Figure 1.**  
 (A) Quantification of lymph node (LN) T and B cells in CD23Cre<sup>+</sup>Myh9<sup>wt/fl</sup> (n=6) and CD23Cre<sup>+</sup>Myh9<sup>fl/fl</sup> (n=4) mice.  
 (B) Quantification of total and mature B cells in the bone marrow (BM) of CD23Cre<sup>+</sup>Myh9<sup>wt/fl</sup> (n=6) and CD23Cre<sup>+</sup>Myh9<sup>fl/fl</sup> (n=4) mice.  
 (C) Percentage of CD23Cre<sup>+</sup>Myh9<sup>wt/fl</sup> and CD23Cre<sup>+</sup>Myh9<sup>fl/fl</sup> Follicular (Fo) and Marginal Zone (MZ) B cells in competitive BM chimeras reconstituted in Rag1-KO mice (n=5 mice). Frequency normalized to percentage of CD23Cre<sup>+</sup>Myh9<sup>wt/fl</sup> and CD23Cre<sup>+</sup>Myh9<sup>fl/fl</sup>-derived T cells.  
 (D) Percentage of labelled MZ B cells in tamoxifen treated R26ERT2Cre<sup>+</sup>Myh9<sup>wt/fl</sup> and R26ERT2Cre<sup>+</sup>Myh9<sup>fl/fl</sup> BM chimeras 5 min after injection with anti-CD19-PE antibody.  
 Mean ± SD. \* P<0.05, \*\* P<0.01, \*\*\* P<0.001 (unpaired t-test)

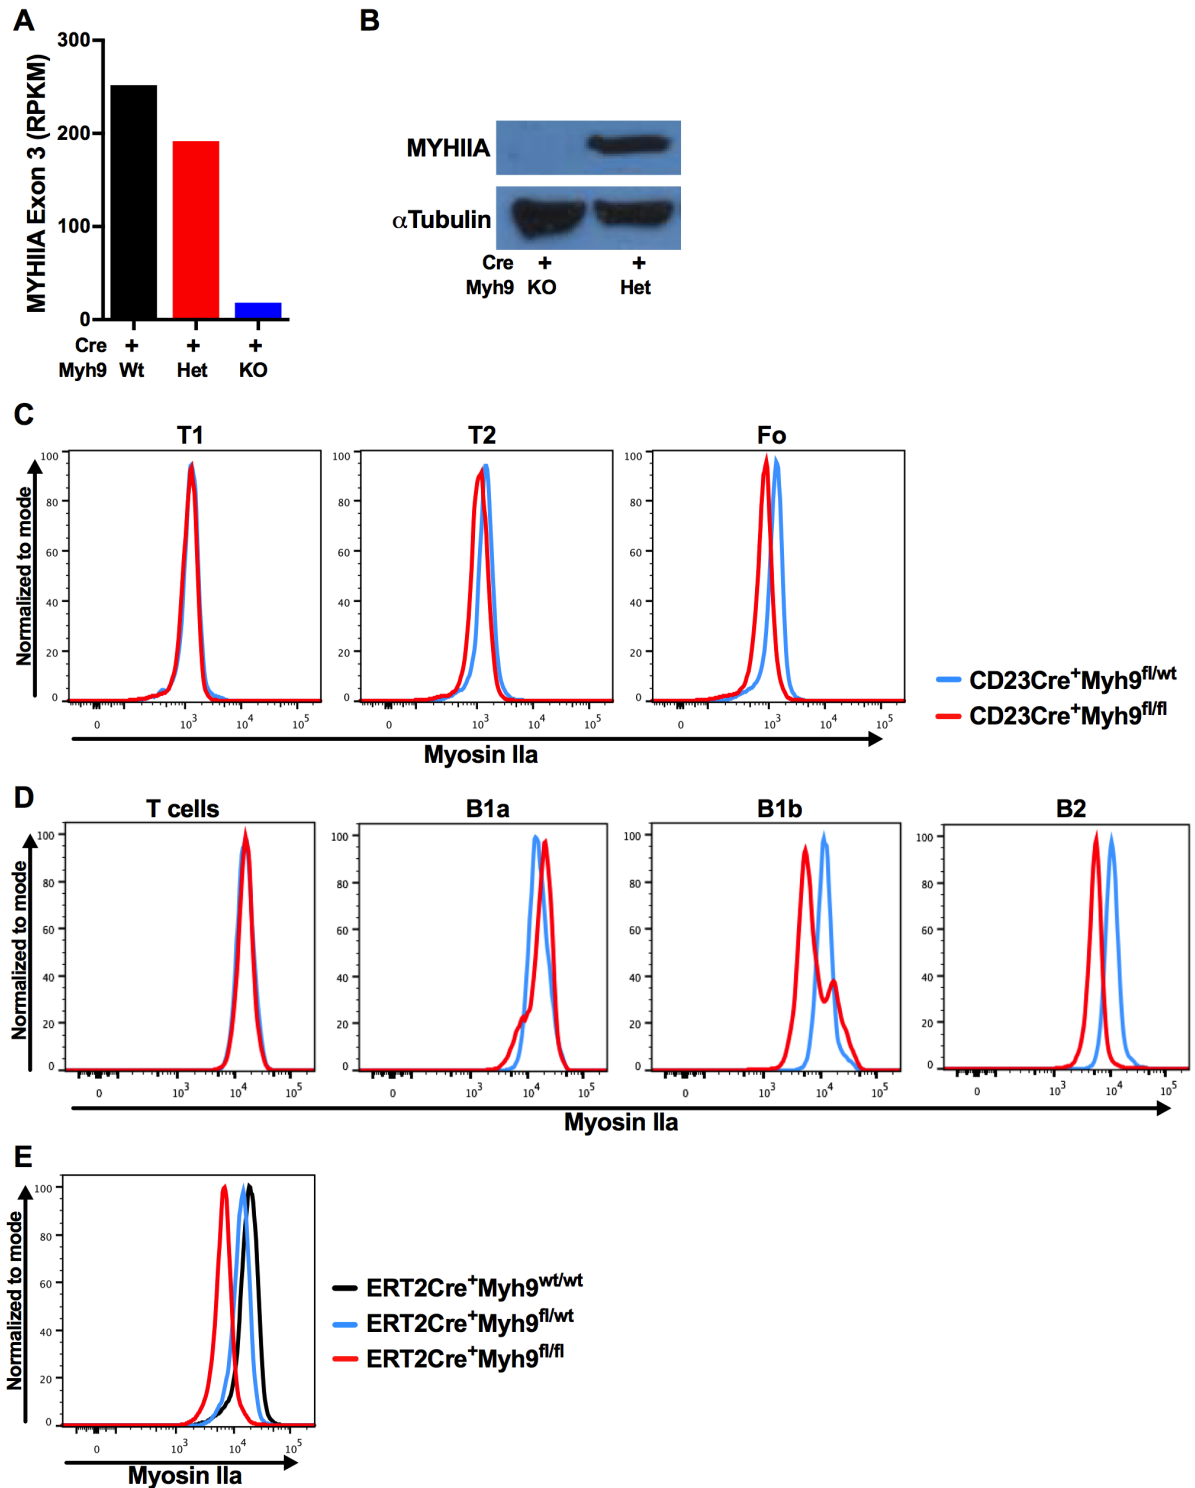

**Figure S2. Myosin deletion in B cells of Mb1Cre<sup>+</sup>Myh9<sup>fl/fl</sup>, CD23Cre<sup>+</sup>Myh9<sup>fl/fl</sup> and tamoxifen-treated R26ERT2Cre<sup>+</sup>Myh9<sup>fl/fl</sup> mice, related to Figure 1.**

(A) Myosin IIa mRNA expression levels of FACS-sorted follicular B cells from CD23Cre<sup>+</sup>Myh9<sup>wt/wt</sup>, CD23Cre<sup>+</sup>Myh9<sup>wt/fl</sup> and CD23Cre<sup>+</sup>Myh9<sup>fl/fl</sup> mice (n=3 mice).

(B) Myosin IIa protein expression level of FACS-sorted follicular B cells from CD23Cre<sup>+</sup>Myh9<sup>wt/fl</sup> and CD23Cre<sup>+</sup>Myh9<sup>fl/fl</sup> mice.

(C) Flow cytometric analysis of myosin IIa protein expression of T1, T2 and follicular (Fo) B cells of CD23Cre<sup>+</sup>Myh9<sup>wt/fl</sup> and CD23Cre<sup>+</sup>Myh9<sup>fl/fl</sup> mice.

(D) Flow cytometric analysis of myosin IIa protein expression of peritoneal cavity T, B1a, B1b and B2 cells of CD23Cre<sup>+</sup>Myh9<sup>wt/fl</sup> and CD23Cre<sup>+</sup>Myh9<sup>fl/fl</sup> mice.

(E) Flow cytometric analysis of myosin IIa protein expression of follicular B cells of R26ERT2Cre<sup>+</sup>Myh9<sup>wt/wt</sup>, R26ERT2Cre<sup>+</sup>Myh9<sup>wt/fl</sup> and R26ERT2Cre<sup>+</sup>Myh9<sup>fl/fl</sup> mice 14 days after the start of tamoxifen administration.

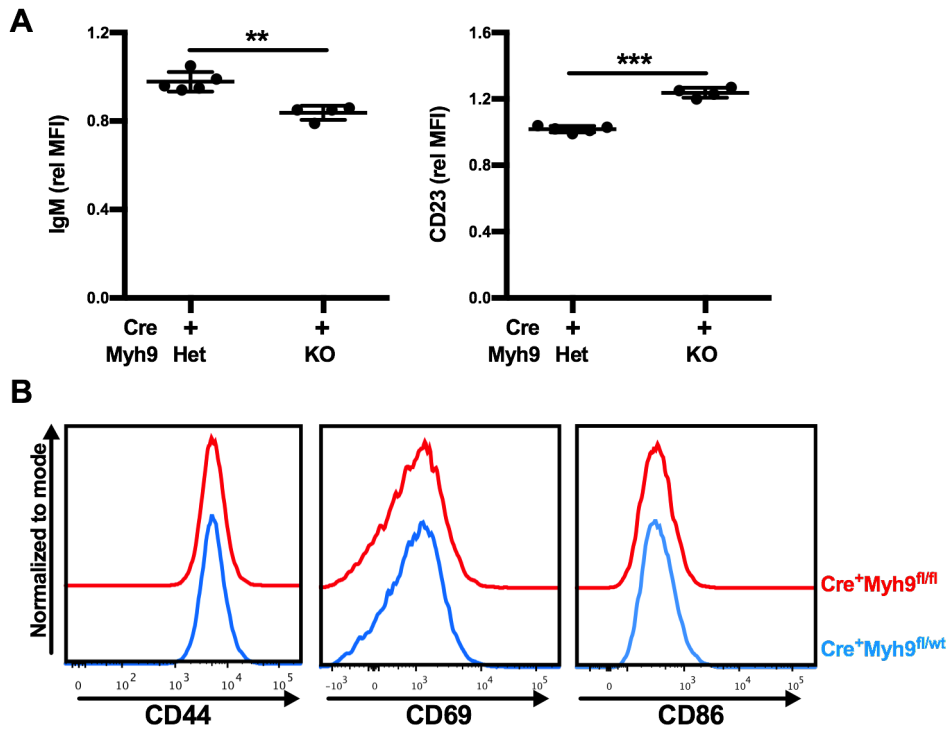

**Figure S3. Follicular B cell surface marker expression of CD23Cre<sup>+</sup>Myh9<sup>fl/fl</sup> mice, related to Figure 2.**

(A) Surface expression of IgM and CD23 on follicular B cells from 20% CD23Cre<sup>+</sup>Myh9<sup>wt/fl</sup>, 80% CD45.1 and 20% CD23Cre<sup>+</sup>Myh9<sup>fl/fl</sup>, 80% CD45.1 competitive bone marrow chimeras. Normalized on expression levels of CD45.1-derived follicular B cells.

(B) Surface expression of CD44, CD69 and CD86 on follicular B cells of CD23Cre<sup>+</sup>Myh9<sup>wt/fl</sup> and CD23Cre<sup>+</sup>Myh9<sup>fl/fl</sup> mice.

Dots represent follicular cells from individual mice. Horizontal bars reflect mean  $\pm$  SD. \*\* P<0.01, \*\*\* P<0.001 (Unpaired t-test).

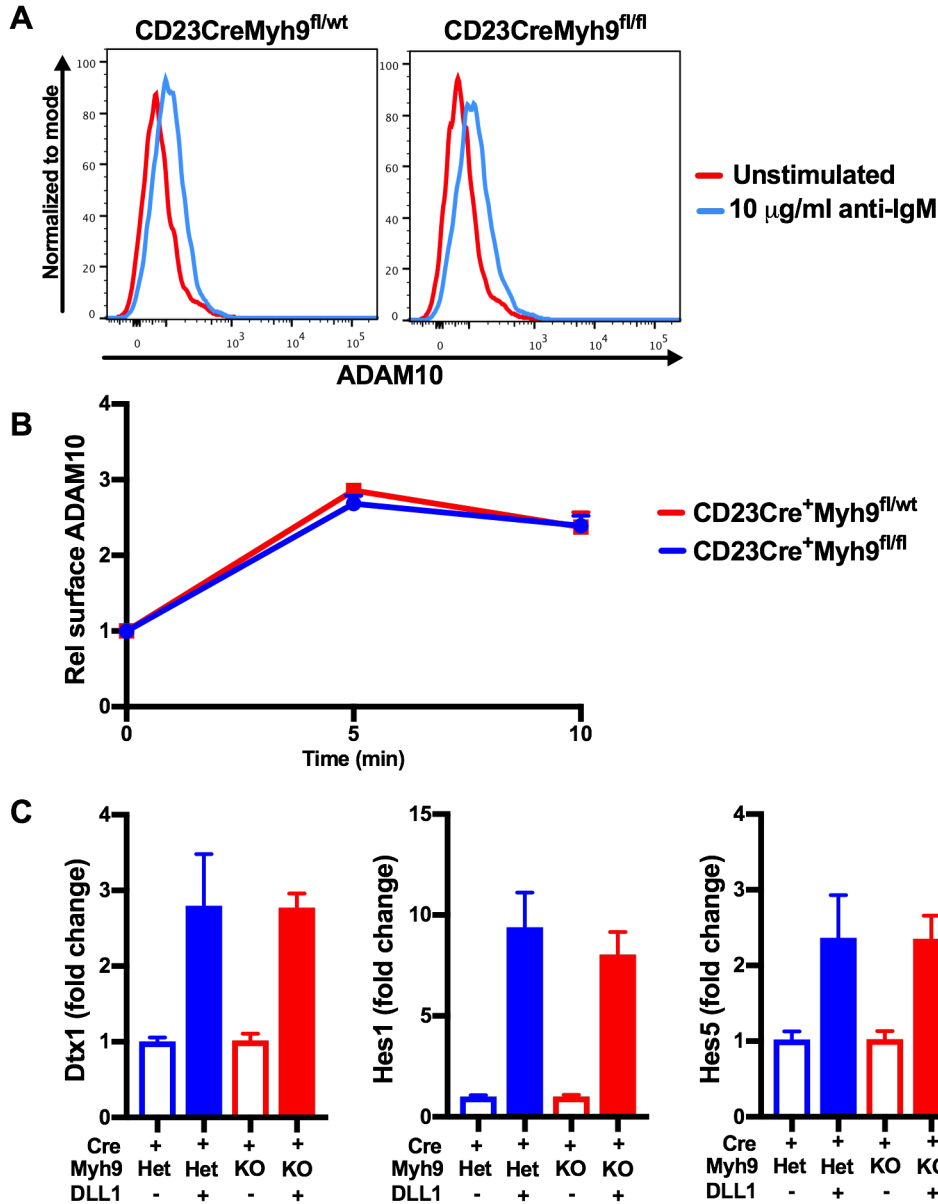

**Figure S4. ADAM10 surface translocation and Notch2 signaling in CD23Cre<sup>+</sup>Myh9<sup>fl/fl</sup> mice, related to Figure 2.**

(A) Flow cytometric analysis of surface ADAM10 expression by B cells of CD23Cre<sup>+</sup>Myh9<sup>w<sup>t</sup>/fl</sup> and CD23Cre<sup>+</sup>Myh9<sup>fl/fl</sup> mice stimulated with soluble anti-IgM for 5 minutes.

(B) Quantification of surface ADAM10 expression by B cells of CD23Cre<sup>+</sup>Myh9<sup>w<sup>t</sup>/fl</sup> and CD23Cre<sup>+</sup>Myh9<sup>fl/fl</sup> mice stimulated with soluble anti-IgM.

(C) Gene expression level of Notch2 target genes *Dtx1*, *Hes1* and *Hes5* by B cells of CD23Cre<sup>+</sup>Myh9<sup>w<sup>t</sup>/fl</sup> and CD23Cre<sup>+</sup>Myh9<sup>fl/fl</sup> mice after 21h co-culture with OP9 that express or do not express Delta-like ligand1 (DLL1). Data normalized on expression levels on OP9 cells not expressing DLL1.

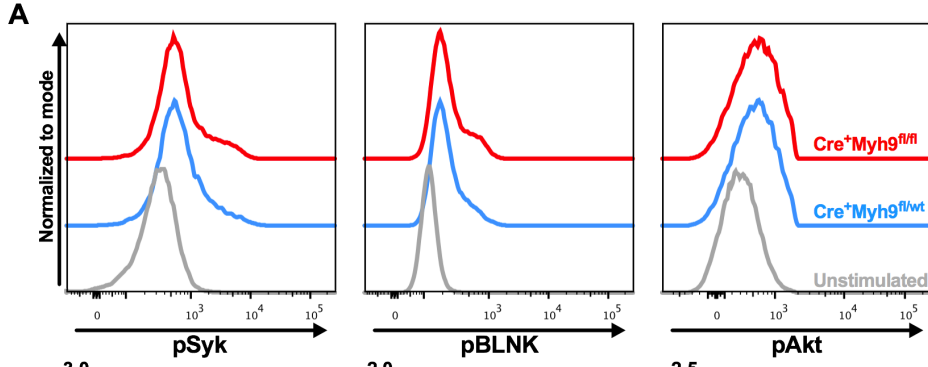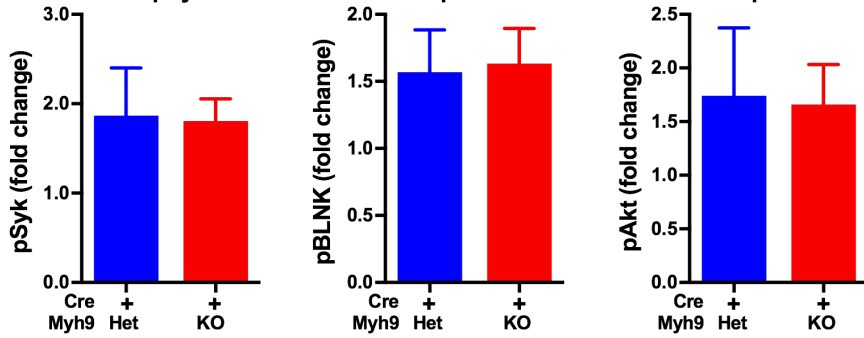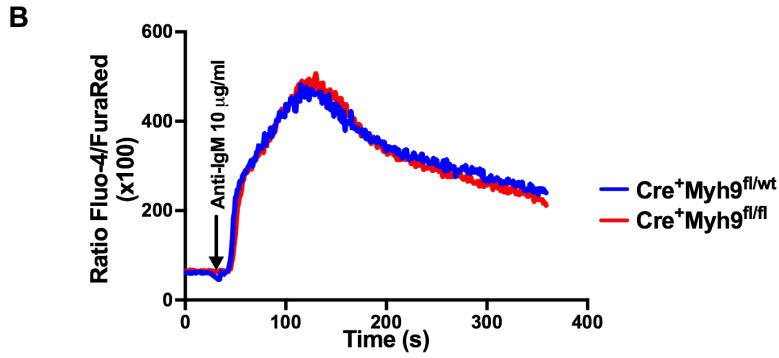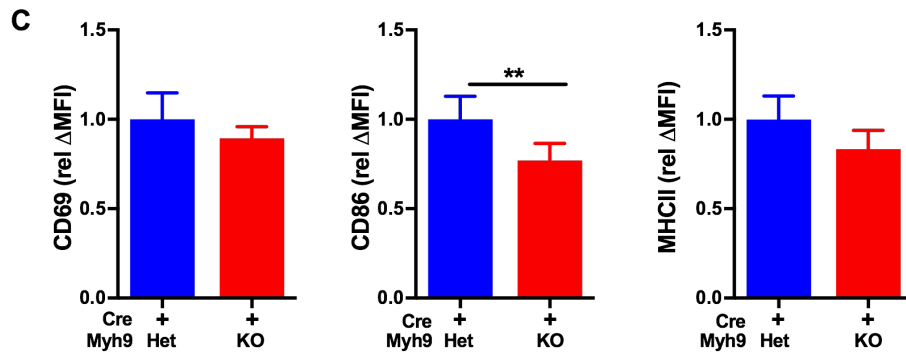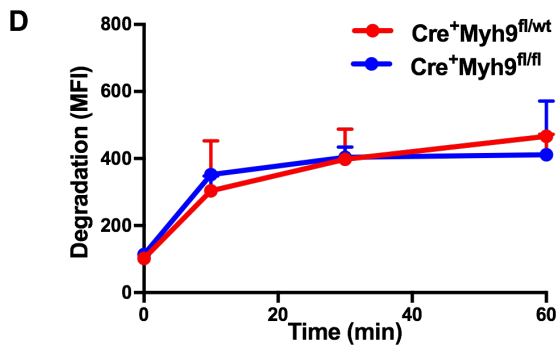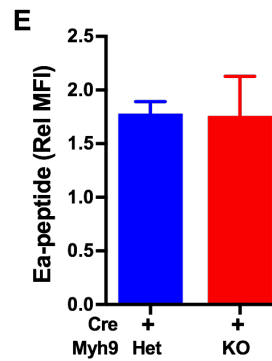

**Figure S5. Normal levels of BCR signaling and antigen internalization of myosin IIa-deficient B cells in response to soluble antigen, related to Figure 3.**

(A) Phosphorylation of Syk, BLNK and Akt in B cells of CD23Cre<sup>+</sup>Myh9<sup>wt/fl</sup> and CD23Cre<sup>+</sup>Myh9<sup>fl/fl</sup> mice stimulated with soluble anti-IgM for 5 (Syk, BLNK) or 15 min (Akt) and quantification (n=5 mice). Phosphorylation levels normalized on unstimulated cells.

(B) Intracellular Ca<sup>2+</sup> fluxes of B cells of CD23Cre<sup>+</sup>Myh9<sup>wt/fl</sup> and CD23Cre<sup>+</sup>Myh9<sup>fl/fl</sup> mice after the addition of soluble anti-IgM (arrow).

(C) Upregulation of CD69, CD86 and MHCII in B cells of CD23Cre<sup>+</sup>Myh9<sup>wt/fl</sup> and CD23Cre<sup>+</sup>Myh9<sup>fl/fl</sup> mice after stimulation with soluble anti-IgM (n=5 mice). Data normalized on follicular B cells of Cre<sup>+</sup>Myh9<sup>wt/fl</sup> littermates.

(D) Degradation of a DNA sensor attached to soluble anti-Igκ by B cells from CD23Cre<sup>+</sup>Myh9<sup>wt/fl</sup> and CD23Cre<sup>+</sup>Myh9<sup>fl/fl</sup> mice (representative for 2 experiments).

(E) Antigen presentation of CD23Cre<sup>+</sup>Myh9<sup>wt/fl</sup> and CD23Cre<sup>+</sup>Myh9<sup>fl/fl</sup> B cells as measured by MHCII-bound Ea peptide 5 hours after incubation with Ea peptide and anti-Igκ loaded microbeads (representative for 2 experiments). Data normalized on cells incubated with anti-Igκ loaded microbeads without Ea peptide.

Mean ± SD. \*\* P<0.01 (unpaired t-test).

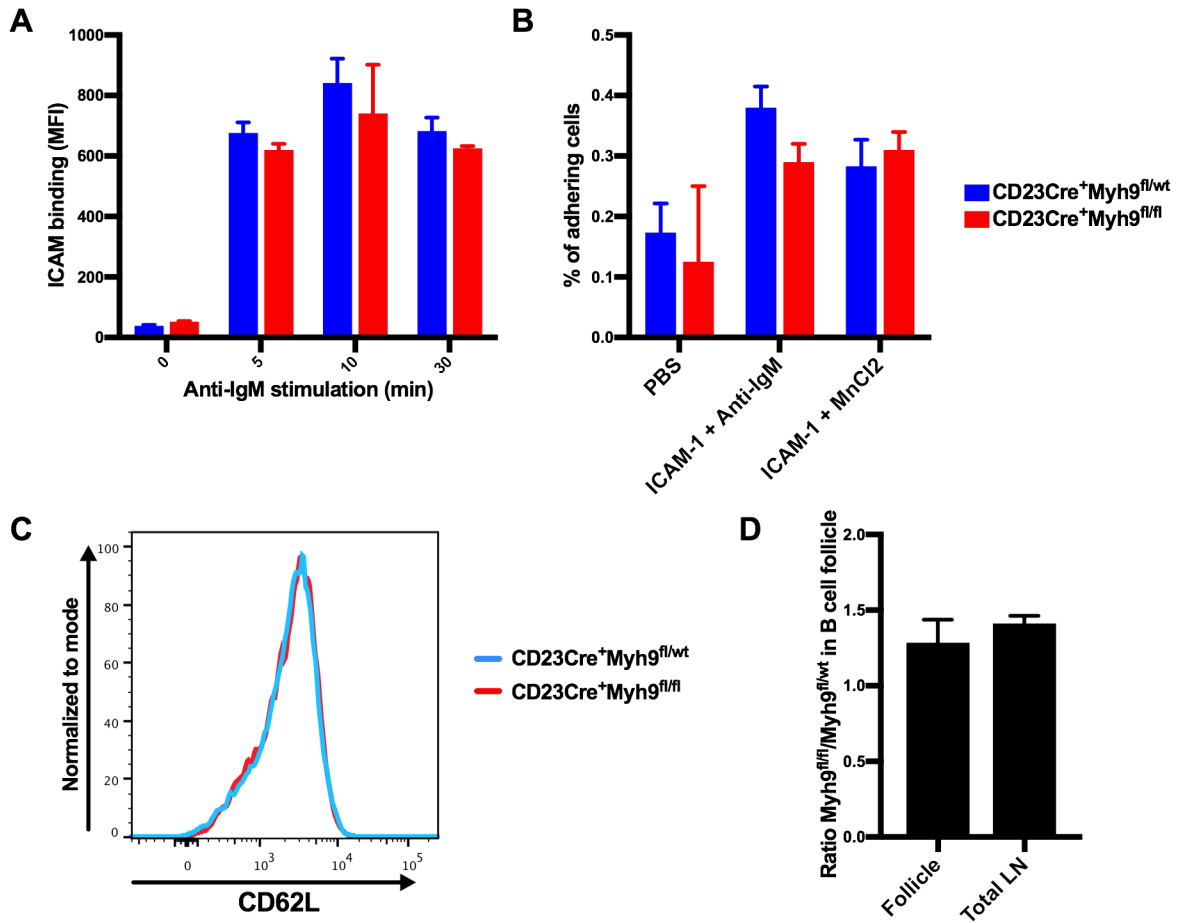

**Figure S6: Initial adhesion to ICAM-1 is normal in myosin IIa-deficient B cells, related to Figure 4.**

(A) Binding of soluble ICAM-1 to anti-IgM-stimulated B cells from CD23Cre<sup>+</sup>Myh9<sup>wt/fl</sup> and CD23Cre<sup>+</sup>Myh9<sup>fl/fl</sup> mice. Mean  $\pm$  SD.

(B) Adhesion of anti-IgM and MnCl<sub>2</sub>-stimulated B cells from CD23Cre<sup>+</sup>Myh9<sup>wt/fl</sup> and CD23Cre<sup>+</sup>Myh9<sup>fl/fl</sup> mice to immobilized ICAM-1. Mean  $\pm$  SD.

(C) Surface expression of CD62L in CD23Cre<sup>+</sup>Myh9<sup>wt/fl</sup> and CD23Cre<sup>+</sup>Myh9<sup>fl/fl</sup> B cells.

(D) Ratio of B cells from CD23Cre<sup>+</sup>Myh9<sup>fl/fl</sup> and CD23Cre<sup>+</sup>Myh9<sup>wt/fl</sup> in B cell follicles 16h after i.v. injection in to C57BL/6J mice determined by immunofluorescence staining of LN cryosections and in the entire LN as assessed by flow cytometry. Ratios normalized to input ratio.



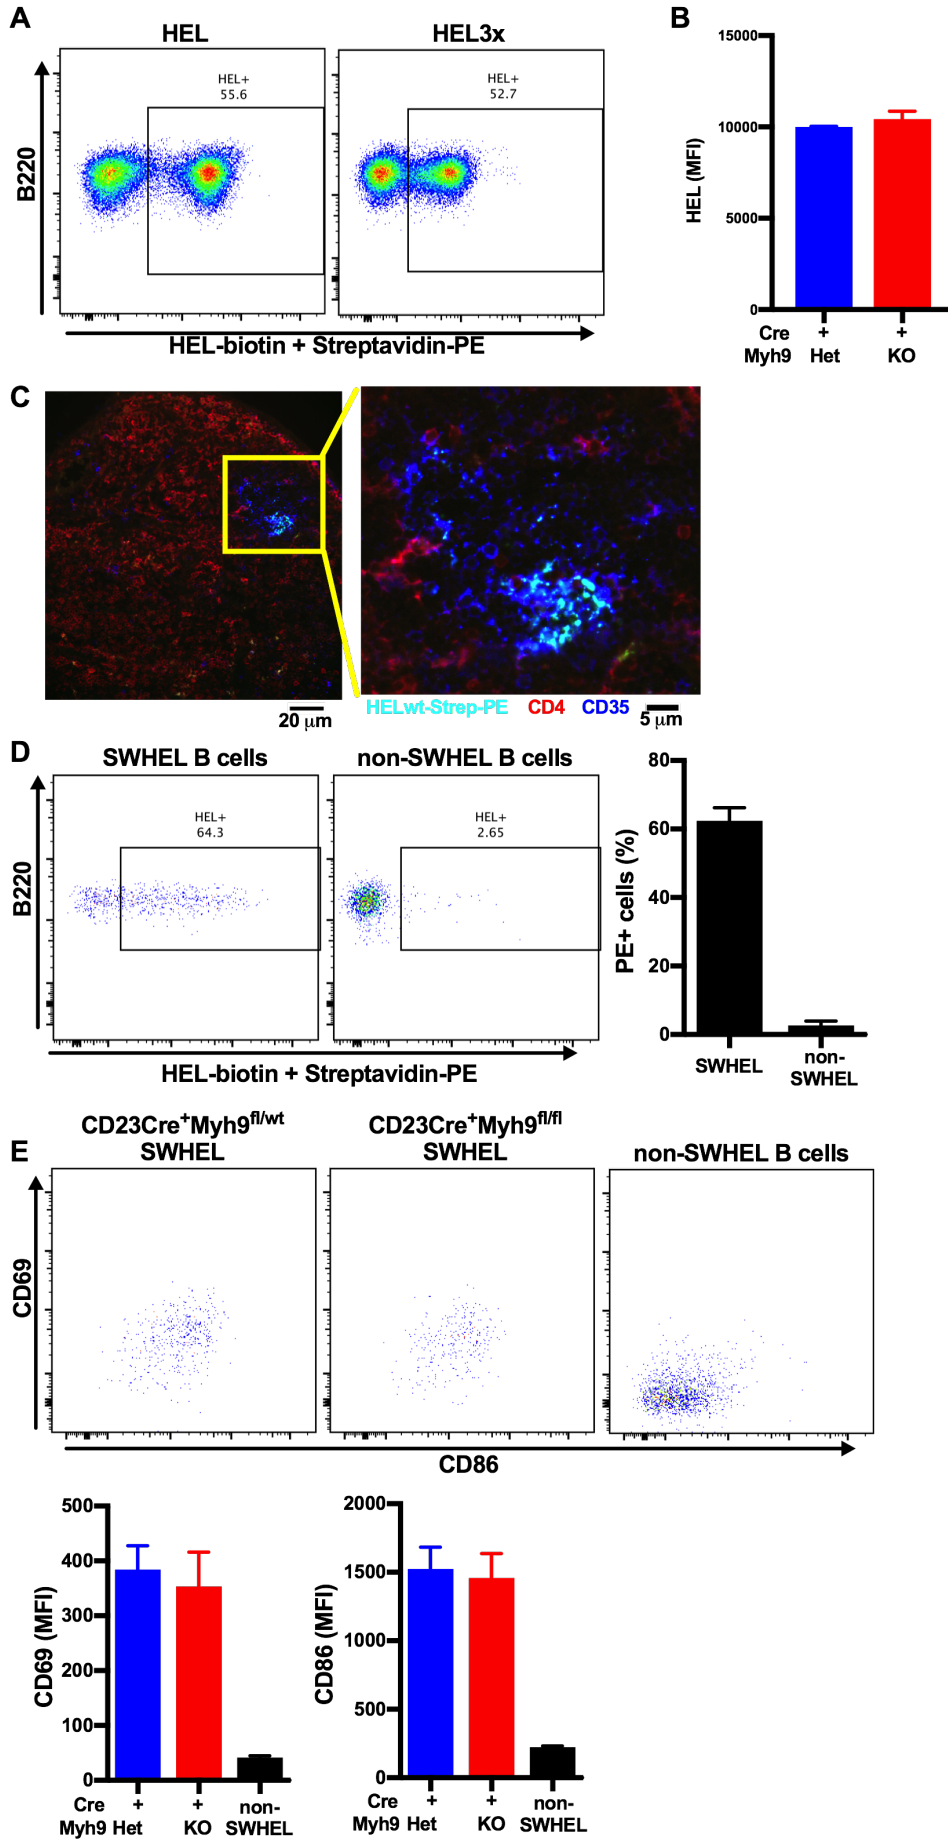

**Figure S7. *In vivo* antigen acquisition, related to Figure 5.**

- (A) Binding of HEL and HEL3x by CD23Cre<sup>+</sup>Myh9<sup>fl/wt</sup>SW<sub>HEL</sub> and CD23Cre<sup>+</sup>Myh9<sup>fl/fl</sup>SW<sub>HEL</sub> B cells *in vitro*.
- (B) Quantification of HEL binding to CD23Cre<sup>+</sup>Myh9<sup>fl/wt</sup>SW<sub>HEL</sub> and CD23Cre<sup>+</sup>Myh9<sup>fl/fl</sup>SW<sub>HEL</sub> follicular B cells *in vitro*.
- (C) HEL-Streptavidin-PE complexes in sections of lymph nodes of immunized mice.
- (D) Flow cytometric analysis and quantification of HEL-Streptavidin-PE complex capture by B cells that express the SW<sub>HEL</sub> BCR and non-SW<sub>HEL</sub> expressing B cells.
- (E) Flow cytometric analysis and quantification of CD69 and CD86 expression by PE-positive CD23Cre<sup>+</sup>Myh9<sup>fl/wt</sup>SW<sub>HEL</sub> and CD23Cre<sup>+</sup>Myh9<sup>fl/fl</sup>SW<sub>HEL</sub> or non-SW<sub>HEL</sub> expressing B cells 14 hours after transfer into HEL-Streptavidin-PE immunized CD45.1 mice.
- Mean ± SD.

**Table S1. Gene expression analysis of FACS-sorted follicular B cells from CD23Cre<sup>+</sup>Myh9<sup>wt/n</sup> and CD23Cre<sup>+</sup>Myh9<sup>n/n</sup> mice (n=3), related to Figure 2**

Significant: p<0.05, q<0.05.

| <b>Downregulated</b> |                                                          |                                                         |                          |                    |
|----------------------|----------------------------------------------------------|---------------------------------------------------------|--------------------------|--------------------|
| <b>Gene name</b>     | <b>CD23Cre<sup>+</sup>Myh9<sup>wt/n</sup><br/>(RPKM)</b> | <b>CD23Cre<sup>+</sup>Myh9<sup>n/n</sup><br/>(RPKM)</b> | <b>log2(fold change)</b> | <b>significant</b> |
| Lcn2                 | 12.5893                                                  | 1.20524                                                 | -3.38481                 | yes                |
| Ngp                  | 13.4001                                                  | 1.29461                                                 | -3.37165                 | yes                |
| Igj                  | 5.39508                                                  | 0.617053                                                | -3.12818                 | yes                |
| Beta-s               | 51.9653                                                  | 7.08096                                                 | -2.87553                 | yes                |
| Hbb-b1, Hbb-b2       | 19.2241                                                  | 3.22646                                                 | -2.57489                 | yes                |
| S100a8               | 145.112                                                  | 25.7663                                                 | -2.49361                 | yes                |
| S100a9               | 174.91                                                   | 34.5411                                                 | -2.34023                 | yes                |
| Hsph1                | 128.76                                                   | 40.3277                                                 | -1.67484                 | yes                |
| Cxcr4                | 113.087                                                  | 39.7103                                                 | -1.50985                 | yes                |
| Spns2                | 12.775                                                   | 4.99355                                                 | -1.35518                 | yes                |
| Ddit4                | 22.5883                                                  | 8.9473                                                  | -1.33605                 | yes                |
| Hspa4l               | 13.2209                                                  | 5.34704                                                 | -1.30601                 | yes                |
| Myh9                 | 50.6481                                                  | 21.1252                                                 | -1.26154                 | yes                |
| P4ha1                | 8.67193                                                  | 3.66499                                                 | -1.24254                 | yes                |
| Wfdc17               | 52.5784                                                  | 22.504                                                  | -1.22429                 | yes                |
| Pde3b                | 20.0566                                                  | 9.11876                                                 | -1.13717                 | yes                |
| Sik1                 | 19.2062                                                  | 8.89217                                                 | -1.11097                 | yes                |
| Slc5a3               | 5.66703                                                  | 2.7072                                                  | -1.06579                 | yes                |
| Fcrl5                | 12.7514                                                  | 6.16063                                                 | -1.0495                  | yes                |
| Chordc1              | 81.7667                                                  | 40.4015                                                 | -1.01711                 | yes                |
| Zfp36l2              | 172.465                                                  | 86.872                                                  | -0.989344                | yes                |
| Gpr171               | 163.275                                                  | 84.7899                                                 | -0.945336                | yes                |
| Hepacam2             | 9.81395                                                  | 5.09649                                                 | -0.945329                | yes                |
| A530032D15Rik        | 27.1144                                                  | 14.1881                                                 | -0.934384                | yes                |
| Dusp1                | 15.2936                                                  | 8.1218                                                  | -0.913059                | yes                |
| Stip1                | 54.3244                                                  | 29.034                                                  | -0.903856                | yes                |
| Apoe                 | 81.8546                                                  | 44.7237                                                 | -0.872025                | yes                |
| Zfp53                | 12.4342                                                  | 7.01072                                                 | -0.826674                | yes                |
| Mavs                 | 25.3436                                                  | 14.3302                                                 | -0.822559                | yes                |
| Ets2                 | 16.6178                                                  | 9.42273                                                 | -0.818515                | yes                |
| Plac8                | 137.563                                                  | 82.0615                                                 | -0.745315                | yes                |
| Ahsa1                | 95.2149                                                  | 57.763                                                  | -0.721043                | yes                |
|                      |                                                          |                                                         |                          |                    |
|                      |                                                          |                                                         |                          |                    |
| <b>Upregulated</b>   |                                                          |                                                         |                          |                    |
| <b>Gene name</b>     | <b>CD23Cre<sup>+</sup>Myh9<sup>wt/n</sup><br/>(RPKM)</b> | <b>CD23Cre<sup>+</sup>Myh9<sup>n/n</sup><br/>(RPKM)</b> | <b>log2(fold change)</b> | <b>significant</b> |
| C2cd5                | 3.88898                                                  | 12.1419                                                 | 1.64253                  | yes                |
| Crisp3               | 6.58979                                                  | 14.0753                                                 | 1.09486                  | yes                |
| Cirbp                | 30.4702                                                  | 60.7195                                                 | 0.99476                  | yes                |
| Il12a                | 18.6664                                                  | 36.8476                                                 | 0.98113                  | yes                |
| Hrsp12               | 16.7785                                                  | 32.1925                                                 | 0.940112                 | yes                |
| Slamf1               | 23.8185                                                  | 40.2892                                                 | 0.758312                 | yes                |
| Slc14a1              | 17.166                                                   | 28.51                                                   | 0.731918                 | yes                |
| Tnf                  | 12.3634                                                  | 22.3179                                                 | 0.852123                 | yes                |

## Supplemental experimental procedures

### Antibodies and flow cytometry

For flow cytometric analysis, erythrocyte-lysed single cell suspensions were stained with appropriate antibodies for 20 min on ice, followed by fixation with 2% paraformaldehyde (PFA). Antibodies against the following proteins were used to identify mouse B cell subsets and stain for activation markers: B220 (RA3-6B2), CD2 (RM2-5), CD69 (H1.3F2), CD86 (GL1) and CD95/Fas (Jo2) from BD Biosciences; CD5 (53-7.3), CD19 (1D3), CD23 (B3B4), CD38 (90), CD93 (AA4.1), IgM (II/41) and MHCII (M5/114.15.2) from eBioscience; CD21 (7E9), CD45.1 (A20) and CD45.2 (104) from BioLegend; ADAM10 (139712) from Novus Biologicals. Live/Dead fixable near-IR Dead Cell stain (ThermoFisher) was used to exclude dead cells. Cells were analyzed on BD FACSCanto II or Fortessa analyzers and sorted on Beckman Coulter MoFlo XDP cell sorters. Data was analyzed using FlowJo 10.0.7 (TreeStar).

### Signaling, activation and proliferation

For signaling, activation, imaging and cell culture experiments, cell suspensions were enriched for B cells by negative selection using anti-CD43 beads (Miltenyi) on an autoMACS cell separator (Miltenyi).

To analyze phosphorylation of BCR signaling pathway components, B cells were stimulated with 10 µg/ml anti-IgM (Jackson ImmunoResearch), fixed with 2% PFA, permeabilized with the Foxp3 fixation/permeabilization kit (eBioscience) and stained with phosphorylation-specific antibodies for Syk (C87C1), Erk (D13.14.4E), Akt (193H12) and BLNK (J117-1278), all from BD Biosciences. To investigate intracellular Ca<sup>2+</sup> fluxes, B cells were labeled with 1 µM Fluo-4 and 1 µM FuraRed (both from ThermoFisher), B220 antibody (RA3-6B2) and live/dead fixable near-IR Dead Cell stain (ThermoFisher). Baseline fluorescence of the dyes was analyzed for 25 seconds by flow cytometry. Then, 10 µg/ml of anti-IgM was added (Jackson ImmunoResearch) and fluorescence of the dyes was acquired for a further 300 seconds. To analyze activation, B cells were stimulated overnight with 10 µg/ml anti-IgM, fixed in 2% PFA and stained for surface activation markers.

To study proliferation, B cells were labeled with 1 µM 5-chloromethylfluorescein diacetate (CMFDA, ThermoFisher) and cultured for 48 hours in DMEM supplemented with 10% fetal calf serum (BioSera), 100 µM non-essential amino acids, 20 mM HEPES, 2 mM glutamine, 50 µM beta-mercaptoethanol, 100 U/ml penicillin and 100 µg/ml streptomycin. When indicated cells were stimulated with 10 µg/ml anti-IgM (Jackson ImmunoResearch), 10 µg/ml LPS (Sigma), 100 µM CpG (Sigma), 1 µg/ml CD40L (R&D Systems) or 100 ng/ml IL-4 (Peprotech). Dilution of CMTFA was analyzed by flow cytometry. To analyze cell cycle progression, cells were stimulated with 100 µM CpG for 48 hours, fixed in PFA, stained for surface markers and permeabilized with the FoxP3 permeabilization kit. Then, DNA was stained with propidium iodide (Sigma) and analyzed by flow cytometry.

### *In vitro* antigen internalization and presentation

Internalization of soluble antigen was analyzed using DNA-based degradation sensors as described (Nowosad et al., 2016). In short, 100 nM of complementary DNA oligomers, one strain labeled with Atto647N and one with quencher Iowa Black RQ, were annealed and attached to anti-Igκ (Southern Biotech) and incubated with purified B cells on ice. After washing, cells were incubated at 37°C and unquenching of Atto647N fluorescence was analyzed by flow cytometry.

To detect antigen presentation, B cells were incubated with Ea-peptide (Biotin-GSGFAKFASFEAQQALANIAVDKA-COOH) and anti-Igκ-loaded microbeads (Bangs laboratories) for 5 hours at 37°C. Cells were fixed with 2% PFA and stained with anti-MHCII-Ea antibody (M5/114.15.2, eBioscience) followed by a fluorescently labeled anti-rat IgG2b antibody (ThermoFisher).

### Large scale imaging

PMS were prepared by shearing off HEK293 cells seeded in poly-L-lysine coated Lab-Tek imaging chambers (ThermoFisher) by sonication, as described (Natkanski et al., 2013). Subsequently, remaining membrane patches were blocked with 1% bovine serum albumin (BSA) and decorated with an in-house biotinylated and Cy3-labeled goat anti-mouse Igκ F(ab')<sub>2</sub> antibody using Annexin V-biotin (BioVision) and streptavidin (Sigma). B cells were labeled with either Cell Trace Violet (CTV) or Cell Trace Far Red (CTFR) (both from ThermoFisher) and mixed with unlabeled control cells or vice versa. Cells were resuspended in warm 0.1% BSA in Hanks-buffered salt solution (HBSS) and incubated in pre-warmed imaging chambers for indicated times. Incubation was stopped by adding PFA. After blocking with normal mouse serum (Jackson ImmunoResearch) cells were stained for B220, followed by permeabilization with the Foxp3 fixation/permeabilization kit and staining for phosphorylated BCR signaling pathway components.

Automated image acquisition was performed by a motorized IX81 microscope with a 100x objective (Olympus) and motorized stage with integrated piezo Z-drive, both controlled by Metamorph software (Molecular Devices). Illumination was supplied by 405 nm (Changchun New Industries), 488 nm, 514 nm (both from LS300, Dynamic

Lasers) and 640 nm lasers (Blue Sky Research). Up to 900 fields of view were acquired per imaging chamber. Images were processed and analyzed using Matlab (Mathworks)-based algorithms developed as described (Nowosad et al., 2016). In short, interactive modules were programmed for (1) determination and correction of background, flatfield and spectral bleedthrough; (2) processing and analysis of three-dimensional multichannel images and identification of cells; (3) display and gating of data. Algorithms are available on request.

### Migration and adhesion

To analyze binding of soluble ICAM-1, B cells were stimulated with 10 µg/ml anti-IgM or 10 mM MnCl<sub>2</sub> in the presence of soluble ICAM-1-Fc chimera protein (R&D systems) complexed to fluorescently-labeled anti-IgG. Cells were fixed with PFA after 5, 10 and 30 minutes and binding of ICAM-1 was analyzed by flow cytometry. To determine adhesion to immobilized ICAM-1, 96-well plates were coated with 5 µg/ml ICAM-1-Fc and blocked with 2% BSA in PBS. Purified B cells were labeled with CTV, resuspended in 0.1% BSA in HBSS and allowed to adhere in the presence of 10 µg/ml anti-IgM or 0.5 mM MnCl<sub>2</sub> for 30 minutes at 37°C. Adherence of cells was analyzed by measuring CTV fluorescence.

To study migration by timelapse imaging, Lab-Tek imaging chambers (ThermoFisher) were coated with ICAM-1-Fc chimera protein and blocked with 2% BSA in PBS. B cells were activated with 1 µg/ml CXCL13 (R&D systems) for 15 minutes and added to warmed ICAM-1-coated chambers containing 1 µg/ml CXCL13 in 0.1% BSA in HBSS. Cells were allowed to adhere for 10 minutes and then brightfield images were acquired every 5 seconds for 40 minutes. TrackMate was used to identify and track cells (Tinevez et al., 2017).

Transwell migration assays were performed using 96 well Transwell inserts with 5 µm polycarbonate membranes (Sigma-Aldrich). Top compartments were coated with 0.5 µg/ml ICAM-1 or 1 µg/ml anti-Igκ F(ab')<sub>2</sub> in PBS, followed by blocking with 2% BSA in PBS. 80,000 cells were added to top compartments and allowed to migrate towards 1 µg/ml CXCL13, 0.5 µg/ml CXCL12 or 1 µg/ml CCL21 (all from R&D systems) in 0.1% FBS in RPMI in the bottom compartment for 3 hours. Migrated B cells were quantified using flow cytometry.

### Gene expression analysis

RNA was isolated from sorted follicular B cells using TriZol (ThermoFisher) and further purified using a RNEasy mini kit (Qiagen). After RNA amplification (Ovation RNA-Seq system V2, NuGen) stranded polyA-enriched libraries were prepared using a TruSeq Nano DNA kit (Illumina), followed by sequencing on a HiSeq 2500 (Illumina). Reads were aligned to C57BL/6J mouse reference genome mm10, GRCm38 and quantified using Tophat and Cufflinks, as described elsewhere (Roberts et al., 2012).

To analyze expression of Notch target genes, RNA was extracted and reverse transcribed using the RNEasy mini and Quantitect Reverse Transcription kits, respectively. Gene expression was analyzed using Taqman technology, probes Mm00492297\_m1 (*Deltex1*), Mm01342805\_m1 (*Hes1*) and Mm00439311\_g1 (*Hes5*) on a Quantstudio 3 Real-Time PCR machine (Applied Biosystems). Data was normalized on expression of *HPRT* (probe Mm00446968).

### Immunizations and ELISA

Mice were immunized by i.p. injection of 50 µg NP-Ficoll or NP-CGG (BioSearch) suspended in alum (ThermoFisher). Serum blood samples were withdrawn before and 7 and 10 days after immunization. To detect NP-specific antibodies by ELISA, nunc polysorb plates were coated with 5 µg/ml NP<sub>13</sub>-BSA (BioSearch), blocked with 3% BSA in PBS and incubated with serial dilutions of serum, followed by incubation with HRP-labeled anti-IgM, anti-IgG1 or anti-IgG3 antibodies (Southern Biotech). Bound HRP was analyzed using 3,3',5,5'-tetramethylbenzidine (TMB). Steady-state serum immunoglobulin levels were determined using the SBA Clonotyping System-C57BL/6-HRP kit (Southern Biotech).

### References

- Natkanski, E., Lee, W.-Y., Mistry, B., Casal, A., Molloy, J.E., Tolar, P., 2013. B Cells Use Mechanical Energy to Discriminate Antigen Affinities. *Science* 340, 1587–1590.
- Nowosad, C.R., Spillane, K.M., Tolar, P., 2016. Germinal center B cells recognize antigen through a specialized immune synapse architecture. *Nat Immunol* 17, 870–877.
- Roberts, A., Goff, L., Perte, G., Kim, D., Kelley, D.R., Pimentel, H., Salzberg, S.L., Rinn, J.L., Pachter, L., Trapnell, C., 2012. Differential gene and transcript expression analysis of RNA-seq experiments with TopHat and Cufflinks. *Nature Protocols* 7, 562–578.
- Tinevez, J.-Y., Perry, N., Schindelin, J., Hoopes, G.M., Reynolds, G.D., Laplantine, E., Bednarek, S.Y., Shorte, S.L., Eliceiri, K.W., 2017. TrackMate: An open and extensible platform for single-particle tracking. *Methods* 115, 80–90.
